# Supplementary material for: Structural Characterization and Anti-Proliferation Activities Against Tumor Cells of an Arabinogalactan from Juniperus convallium
Source: Molecules. 2019 May 14;24(10):1850. doi: 10.3390/molecules24101850 (PMC6571648; doi:10.3390/molecules24101850)
Supplement: Supplementary file 1 [file molecules-24-01850-s001.pdf]

# Structural characterization and anti-proliferation activities against tumor cells of an arabinogalactan from *Juniperus convallium*

Beibei Li <sup>1</sup>, Mengxue Dong <sup>1</sup>, Ji De <sup>2</sup>, Li Ye <sup>1</sup>, Daofeng Chen <sup>1</sup> and Yan Lu <sup>1,\*</sup>

<sup>1</sup> School of Pharmacy, Fudan University, Shanghai 201203, People's Republic of China

<sup>2</sup> College of Science, Tibet University, Lhasa 850000, Tibet, People's Republic of China

\* Correspondence: luyan@fudan.edu.cn; Tel.: +86-021-51980157 (Y.L.)

Figure S1. The IR spectrum of JC-PS1

Figure S2.  $^1\text{H}$ - $^1\text{H}$  COSY spectrum of JC-PS1.

Figure S3. Cytotoxicity of JC-PS1 on RAW264.7 cells. The data were represented as mean  $\pm$  SD (n=3).

Figure S4. The repeating unit of JC-PS2.

Table S1. Alditol acetate derivatives from the methylated JC-PS2.

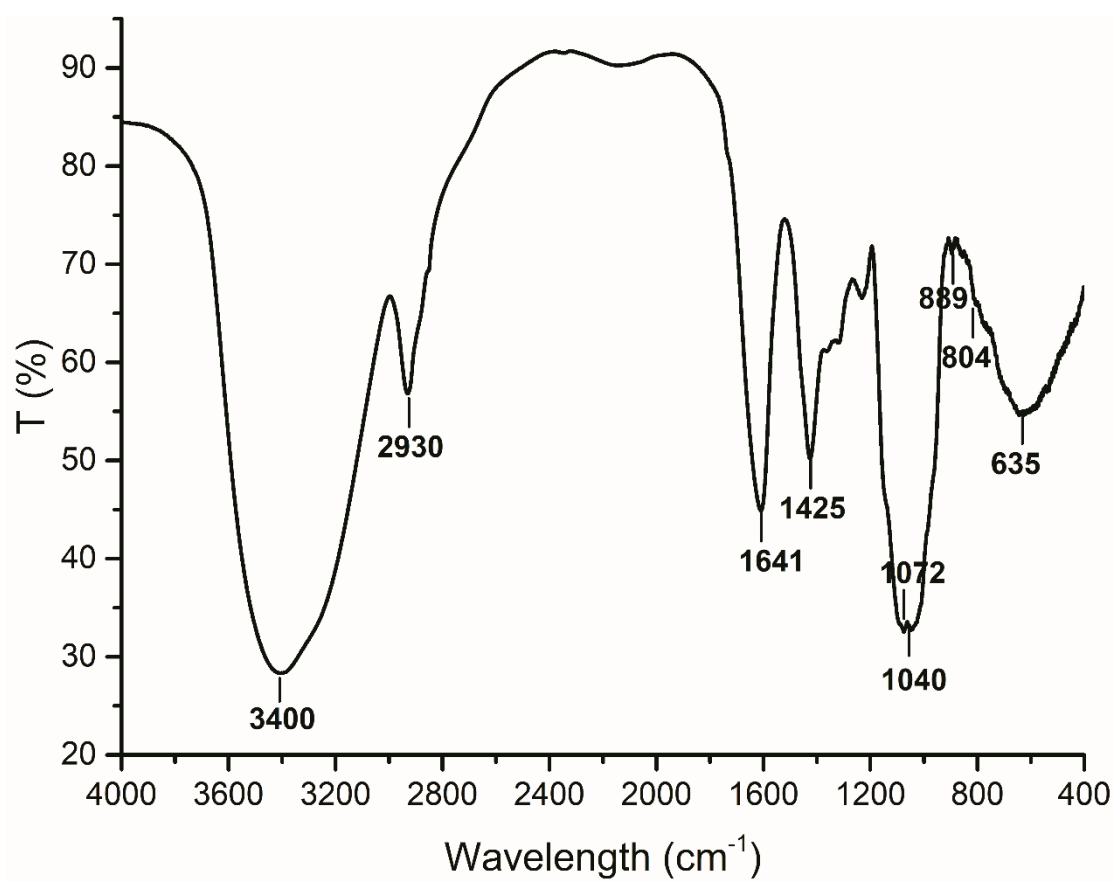

**Figure S1.** The IR spectrum of JC-PS1

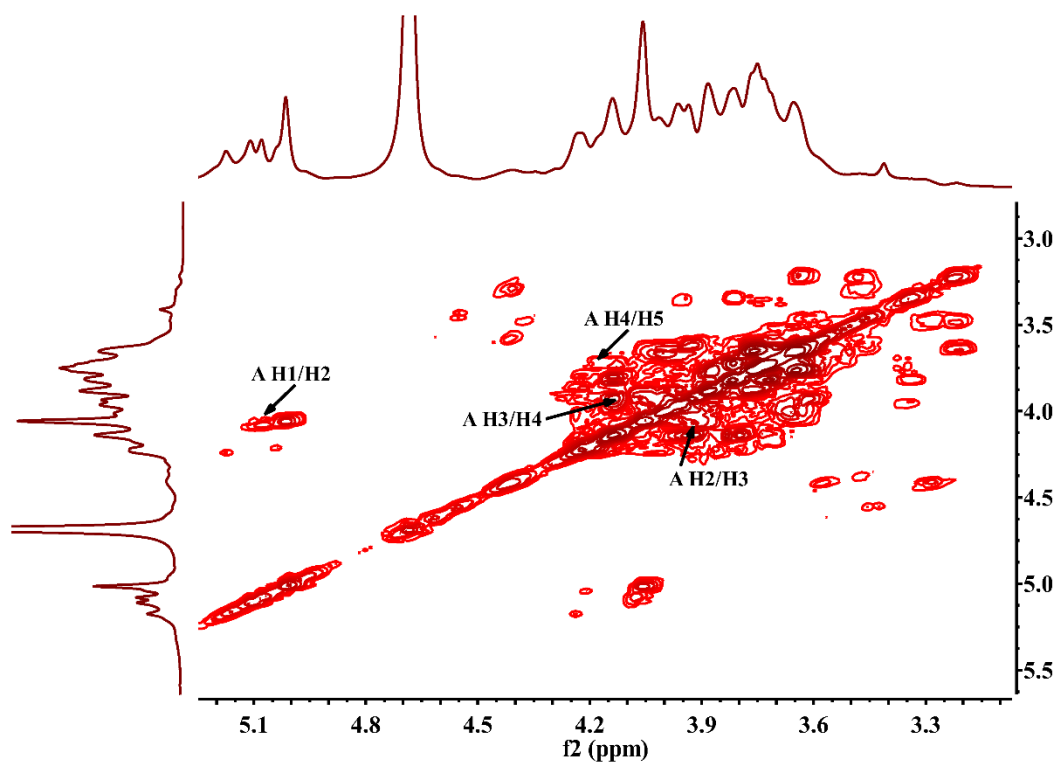

**Figure S2.**  $^1\text{H}$ - $^1\text{H}$  COSY spectrum of JC-PS1.

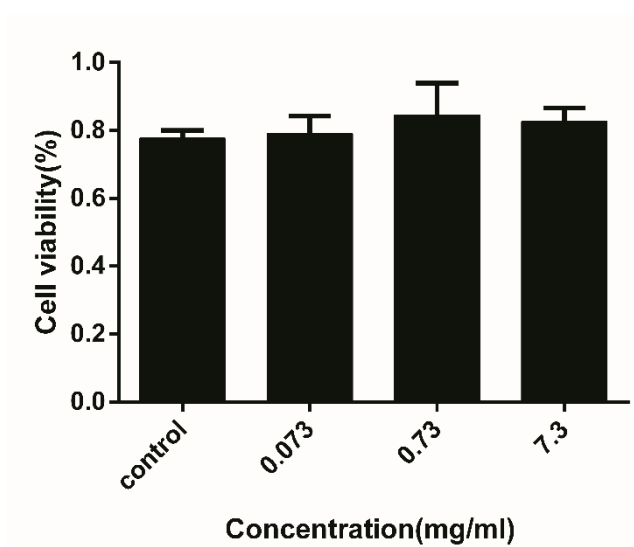

**Figure S3.** Cytotoxicity of JC-PS1 on RAW264.7 cells. The data were represented as mean  $\pm$  SD (n=3).

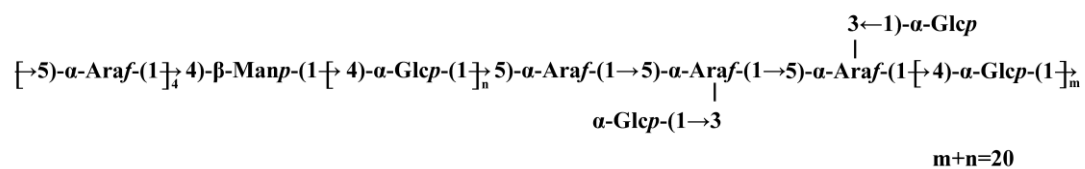

**Figure S4.** The repeating unit of JC-PS2.

**Table S1.** Alditol acetate derivatives from the methylated JC-PS2

| No | Methylations<br>sugars | Linkage        | Molar ratios |                                      | MS Fragments |
|----|------------------------|----------------|--------------|--------------------------------------|--------------|
| 1  | 2,3,6-Me3-Glcp         | →4)-Glcp-(1→   | 30.1         | 71,87,99,101,113,117,129,131,173,233 |              |
| 2  | 2,3,4,6-Me4-Glcp       | Glcp-(1→       | 3.1          | 71,87,101,117,129,145,161,205        |              |
| 3  | 2,3,6-Me3-Manp         | →4)-Manp-(1→   | 1.1          | 71,87,99,101,113,117,129,131,161,233 |              |
| 4  | 2-Me-Araf              | →3,5)-Araf-(1→ | 3.5          | 71,85,99,117,127,159,201,261         |              |
| 5  | 2,3-Me2-Araf           | →5)-Araf-(1→   | 10.4         | 71,87,101,117,129,161,189            |              |
